# Supplementary material for: Anisotropic superhydrophobic graphene aerogel with radial superelasticity and axial superstiffness for efficient on-demand oil–water separation
Source: Royal Society of Chemistry journal article supplement (doi:10.1039/d3ta03859a), 2023-01-01
Supplement: d3ta03859a1.pdf [file d3ta03859a1.pdf]

## Supplementary Information

### **Anisotropic superhydrophobic graphene aerogel with radial superelasticity and axial superstiffness for efficient on-demand oil-water separation**

Yu Yang<sup>a,b</sup>, Zhiying Ren<sup>a,b,\*</sup>, Chunhui Zhou<sup>a,b</sup>, Youxi Lin<sup>a,b</sup>, Linwei Shi<sup>a,b</sup>, Linxi Hou<sup>c, d,\*</sup>

---

*<sup>a</sup>College of Mechanical Engineering and Automation, Institute of Metal Rubber & Vibration Noise, Fuzhou University, Fuzhou 350116, People's Republic of China.*

*<sup>b</sup>Fuzhou Friction and Lubrication Industry Technology Innovation Center, Fuzhou 350116, People's Republic of China.*

*<sup>c</sup>Department of Materials-Oriented Chemical Engineering, College of Chemical Engineering Fuzhou University, Fuzhou 350116, People's Republic of China.*

*<sup>d</sup>Qingyuan Innovation Laboratory, Quanzhou, 362801, China.*

\*E-mail: [renzyrose@126.com](mailto:renzyrose@126.com) (Ren); [lxhou@fzu.edu.cn](mailto:lxhou@fzu.edu.cn) (Hou)

### 1. Graphene sheets stacked

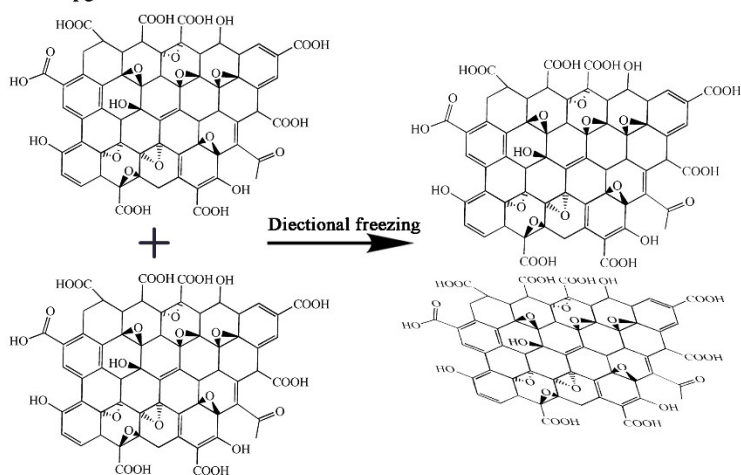

### 2. Binding of PVA polymer chains

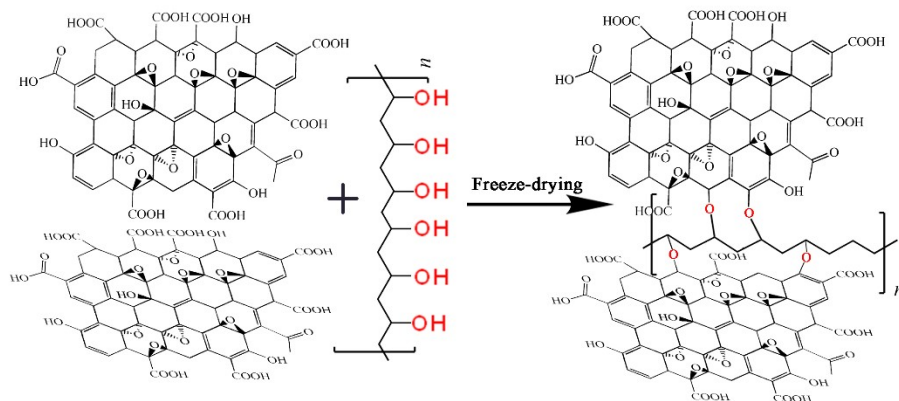

### 3. Cross-linking of MTES monomers

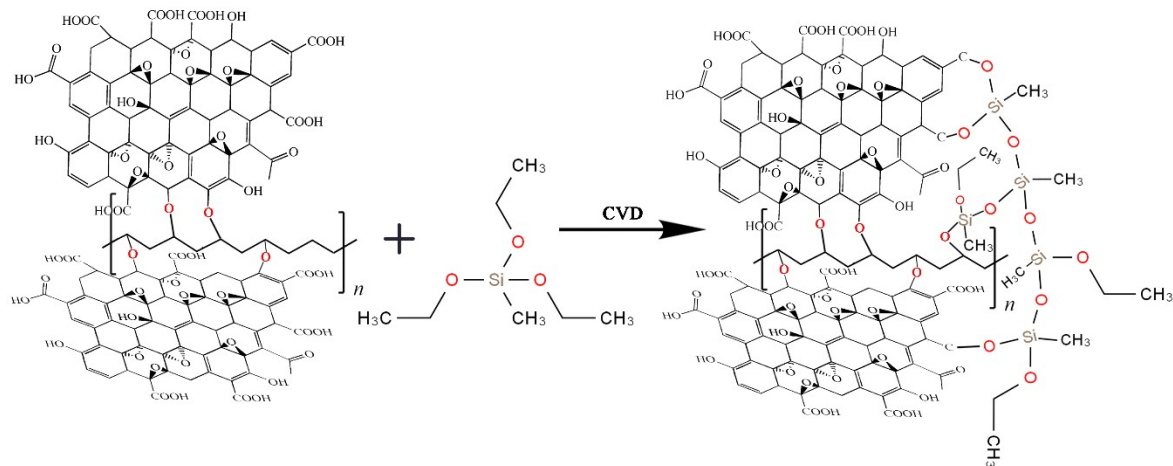

Fig. S1 the reaction schematic of the stacking state of graphene sheets, the combination of PVA polymer chains with graphene sheets, and the cross-linking of MTES monomers.

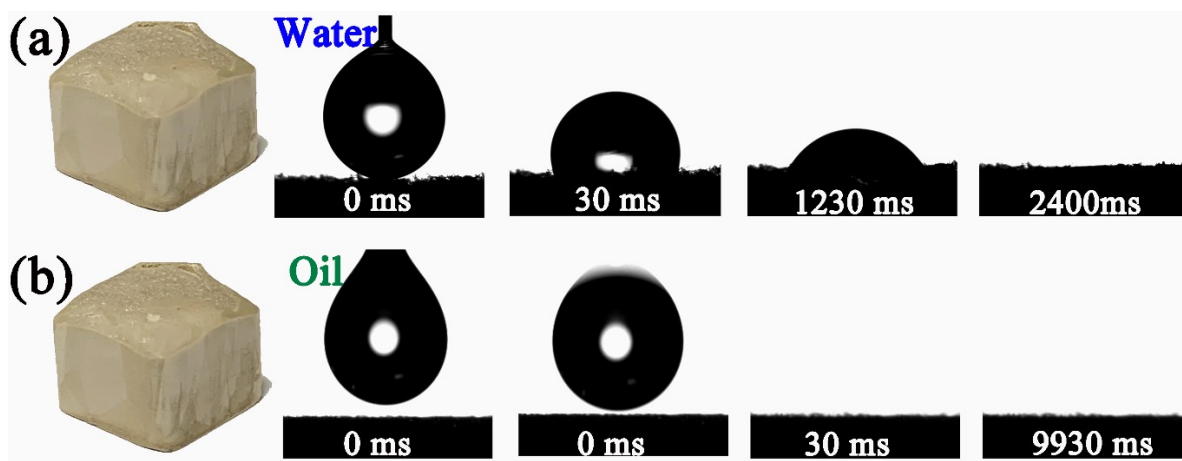

Fig. S2 The wettability of the sample (GPA) without MTES crosslinking. (a) Dynamic wetting behavior of water on GPA. (b) Dynamic wetting behavior of oil on GPA.

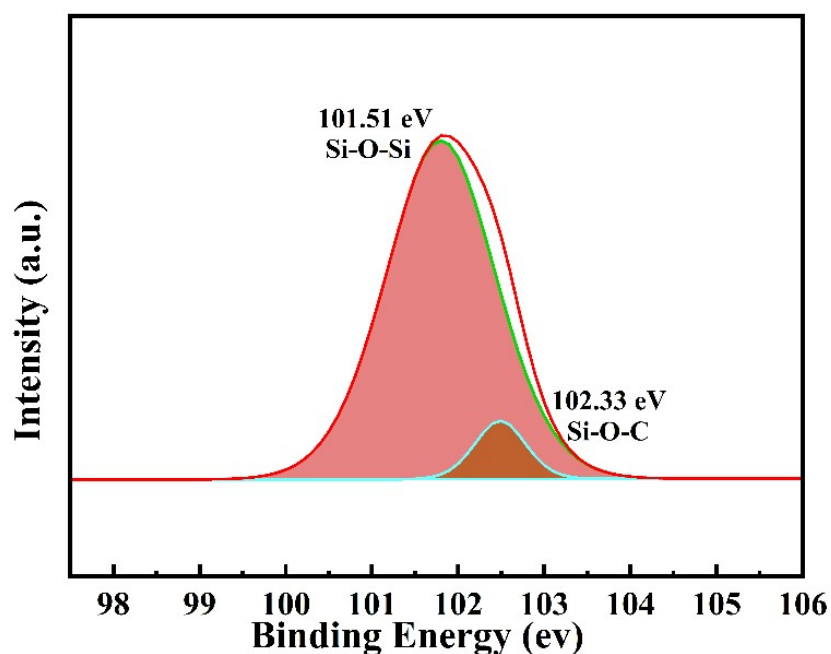

Fig. S3 High-resolution XPS Si 2p spectra of the Si-GPA.

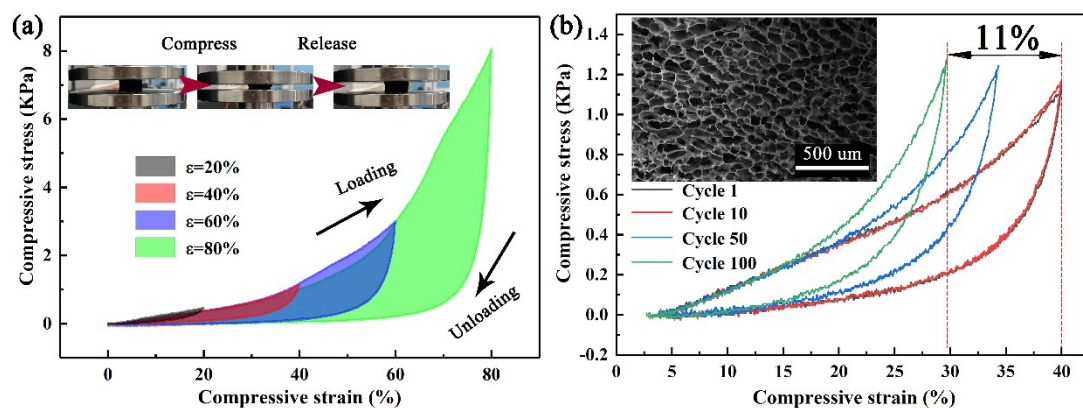

Fig. S4 Hysteresis curves of GPA prepared by non-vertical freeze-drying methods. (a) Compressive stress–strain cycles of GPA with maximum strains of 20, 40, 60, and 80% in succession. Insets: Snapshots of GPA under compression–release cycle ( $\epsilon = 80\%$ ). (b) Cyclic compressive stress–strain curves of GPA at 40% maximum strain for 1, 10, 50, 100 cycles. Insets: internal SEM of GPA after 100 times compression.

The hysteresis curves of aerogels prepared by non-vertical freeze-drying methods, as shown in Fig. S4, do not differ much from those of Si-GPA for 20% to 80% compression. However, the difference in durability is huge, with the deformation of GPA exceeding 10% after 100 cycles, whereas the shape of Si-GPA remains basically unchanged even after 50,000 cycles of compression. It can also be seen from the inset that the aperture of the sample with non-vertical freezing is also without a deterministic shape.

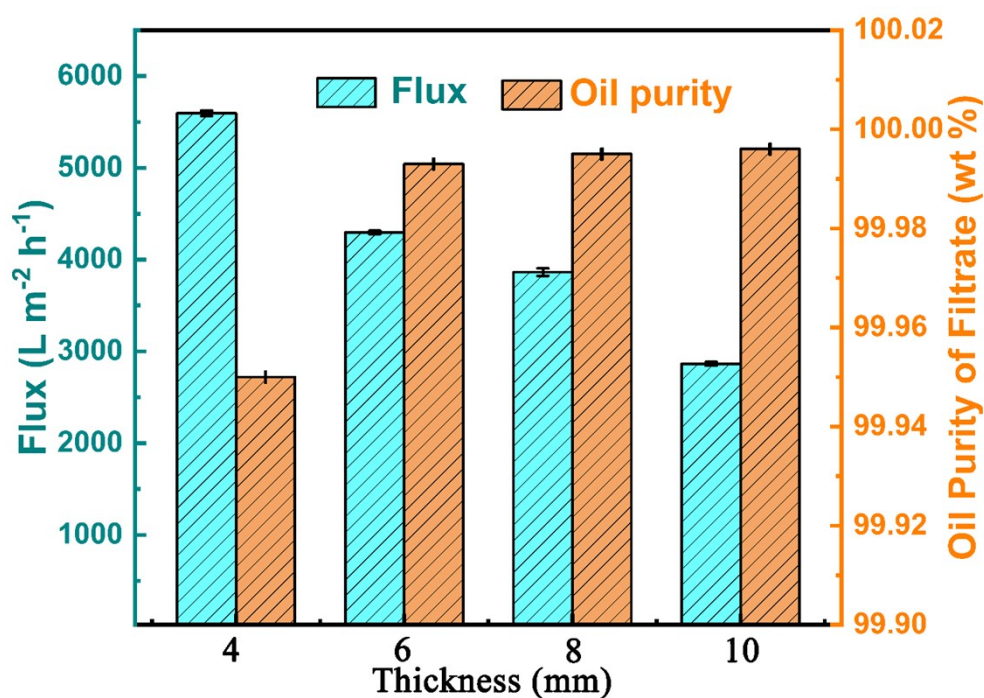

Fig. S5 Thickness of Si-GPA as a function of flux and efficiency

As shown in Figure S5, the filtration flux decreased with the increasing height of the Si-GPA sample, while the oil purity increased initially and then stabilized. At a height of 6 mm, the oil purity reached over 99.99%, but it remained nearly constant above 6 mm. Therefore, we chose a 6 mm-high Si-GPA sample as the oil-water filtration material, retaining both high flux and high precision.

**Table S1** Comparison of emulsions separation performance between our work with other representative 2D superwetting oil-water separation materials in 2023.

| Material                                                       | Fabrication methods                                                    | Emulsion types         | Flux (L/ m <sup>2</sup> h) | Pressure | Efficiency (%) | Reference /Year |
|----------------------------------------------------------------|------------------------------------------------------------------------|------------------------|----------------------------|----------|----------------|-----------------|
| Silane-crosslinked graphene oxide/polyvinyl alcohol aerogel    | freeze-drying and chemistry vapor deposition (CVD)                     | water-in-oil           | 4350                       | gravity  | 99.9%          | This work       |
| Stainless steel mesh                                           | growing hierarchical cobalt phosphide arrays                           | oil-in-water emulsions | 2248                       | 0.1bar   | 99.10%         | 1               |
| Electro-Fenton assisted superhydrophilic membrane              | Partial hydrophilic modification                                       | Oil-in-water emulsion  | 2258                       | gravity  | 99.9%          | 2               |
| Janus polyacrylonitrile nanofiber membranes                    | carbon nanotubes (CNTs) doped with PAN                                 | water-in-oil emulsion  | 2188                       | gravity  | 99.8%          | 3               |
| Superhydrophobic fiberglass (FG) membrane                      | Dodecyltrimethoxysilane (DTMS)-modified TiO <sub>2</sub>               | water-in-oil emulsion  | 3130                       | gravity  | 99.0%          | 4               |
| SiO <sub>2</sub> /PDA@CuC <sub>2</sub> O <sub>4</sub> membrane | bridging polydopamine                                                  | Oil-in-water emulsion  | 2500                       | gravity  | 99.7%          | 5               |
| Ag@sPEN nanofibrous membranes                                  | electrospun                                                            | Oil-in-water emulsion  | 3597                       | 0.09mPA  | 99.0%          | 6               |
| Cellulose ester (MCE) membrane                                 | spray                                                                  | Oil-in-water emulsion  | 1555                       | gravity  | 99%            | 7               |
| Polytetrafluoroethylene nanofibrous membrane                   | shear-induced in-situ fibrillation                                     | water-in-oil emulsion  | 1744                       | 1.5bar   | 99.9%          | 8               |
| Polyethylene terephthalate fiber membrane                      | electrostatic spinning, in-situ deposition and surface modification    | water-in-oil emulsion  | 1100                       | gravity  | 99.5           | 9               |
| PAAm-TA hydrogel coated PVDF membranes                         | coated                                                                 | Oil-in-water emulsion  | 1184                       | gravity  | 99.47          | 10              |
| Palm skin membrane                                             | freezing and salting out strategy                                      | oil-in-water emulsion  | 1298                       | gravity  | 99.9           | 11              |
| PTFE@ZIF-8 fibrous membrane                                    | electrospun                                                            | water-in-oil emulsion  | 2157                       | gravity  | 99.5           | 12              |
| PVDF membrane                                                  | in-situ growth of silver nanoparticles                                 | Oil-in-water emulsion  | 2357                       | gravity  | 99.4           | 13              |
| Janus silicon carbide membrane                                 | emerging reactive sintering method                                     | water-in-oil emulsion  | 1910                       | gravity  | 99.3           | 14              |
| Superhydrophobic/superoleophilic surface                       | double depositions of SiO <sub>2</sub> -TiO <sub>2</sub> nanoparticles | oil-in-water emulsion  | 3000                       | gravity  | 99.2           | 15              |

CFD Simulation:

Table S2 Physical parameters of fluids.

| Fluids   | Density (kg/m <sup>3</sup> ) | Viscosity (kg/(mⓉs))  | Volume ratio | Interfacial tension(N/M) | Contact angle    |
|----------|------------------------------|-----------------------|--------------|--------------------------|------------------|
| water    | 998.2                        | 0.001                 | 1            | 0.072(air)               | 152° (under air) |
| n-hexane | 660.0                        | 0.0003                | 64           | 0.032(n-hexane)          | 0° (under air)   |
| air      | 1.205                        | 1.79×10 <sup>-5</sup> | 35           | 0.02(n-hexane)           | 0° (under oil)   |

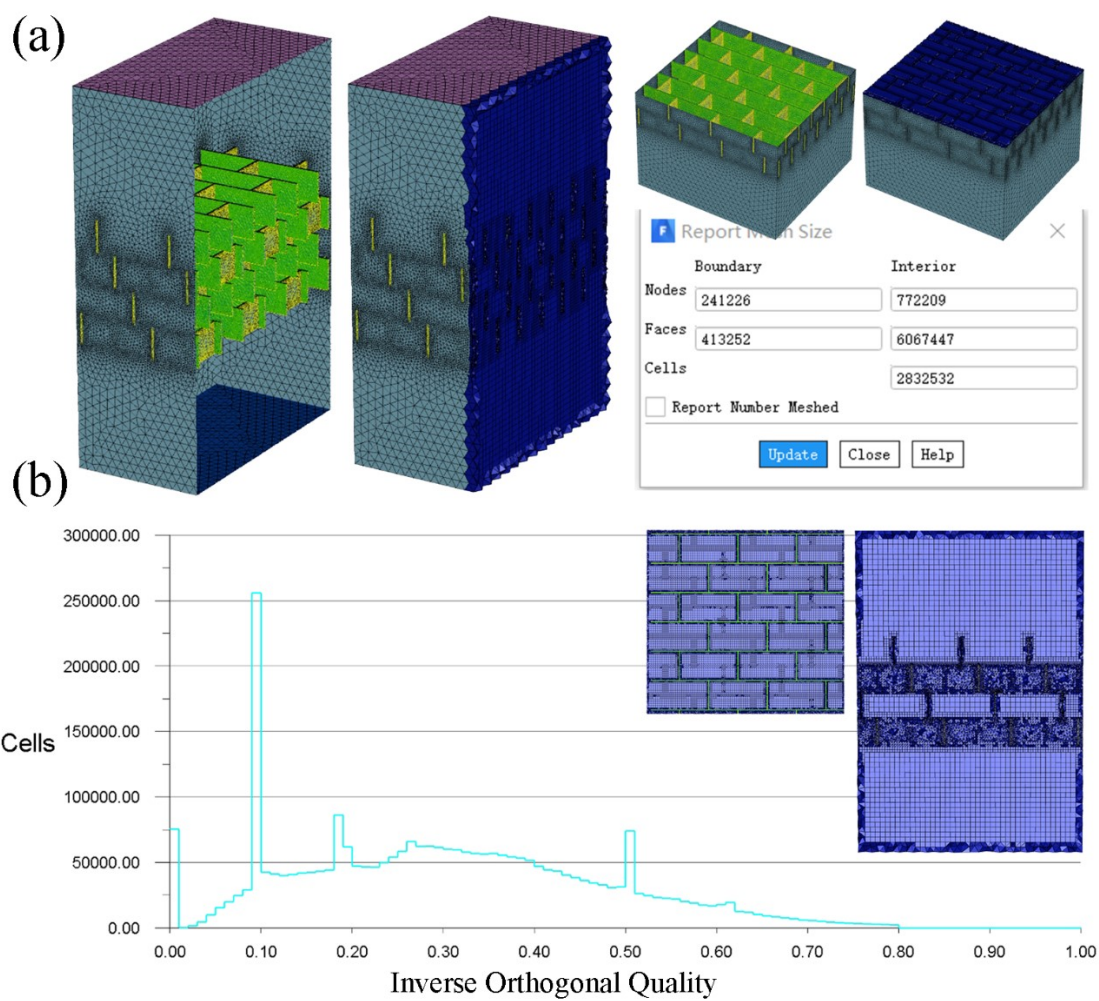

Fig. S6 Mesh model. (a) Face mesh and body mesh sectional views, and mesh count chart, (b) Inverse orthogonal quality chart (The inset is a straight view of the mesh section).

## 1.Method for interfacial tension force

The continuum surface force (CSF) model was proposed by Brackbill. Interprets surface tension as a continuous, three-dimensional effect across an interface, rather than as a boundary value condition on the interface. Surface tension effects are modeled by the addition of a source term in the momentum equation. To understand the origin of the source term, consider the special case where surface tension is constant along the surface, and where only the forces normal to the interface are considered. The pressure drop across the surface depends upon the surface tension coefficient,  $\sigma$ , and the surface curvature as measured by two radii in the orthogonal directions,  $R_1$  and  $R_2$  :

$$p_2 - p_1 = \sigma \left( \frac{1}{R_1} + \frac{1}{R_2} \right) \quad (1)$$

where  $p_1$  and  $p_2$  are the pressures in two fluids on either side of the interface.

The surface curvature was computed from the local gradients in the surface normal at the interface. Let  $n$  be the surface normal, defined as the gradient of  $\alpha_q$ , the volume fraction of the  $q^{th}$  phase.

$$n = \nabla \alpha_q \quad (2)$$

The curvature,  $\kappa$ , is defined in terms of the divergence of the unit normal,  $\hat{n}$

$$\kappa = \nabla \cdot \hat{n} \quad (3)$$

$$\hat{n} = \frac{n}{|n|} \quad (4)$$

Surface tension can be written in terms of pressure jump across the surface. The force at the surface can be expressed as a volume force using the divergence theorem. This volume force is a source term in the momentum equation, and is expressed as:

$$F_{sf} = F_{vol} = \sigma_{ij} \frac{\rho \kappa_i \nabla \alpha_i}{\frac{1}{2}(\rho_i + \rho_j)} \quad (5)$$

where  $\rho$  is the volume-averaged density.

## 2. Method for describing wettability

To describe the wettability on the membrane surface, a method developed by Sussman was employed.

The interface represented by VOF function  $C$  was extrapolated into the membrane wall ensuring that the specified contact angle was satisfied (Fig. S7):

$$\frac{\partial C}{\partial \tau_2} + u_{extend} \nabla C = 0 \quad (6)$$

Here,  $\tau_2$  is the pseudo time and set at  $0.5 \Delta x$ , and  $u_{extend}$  is the extended velocity.

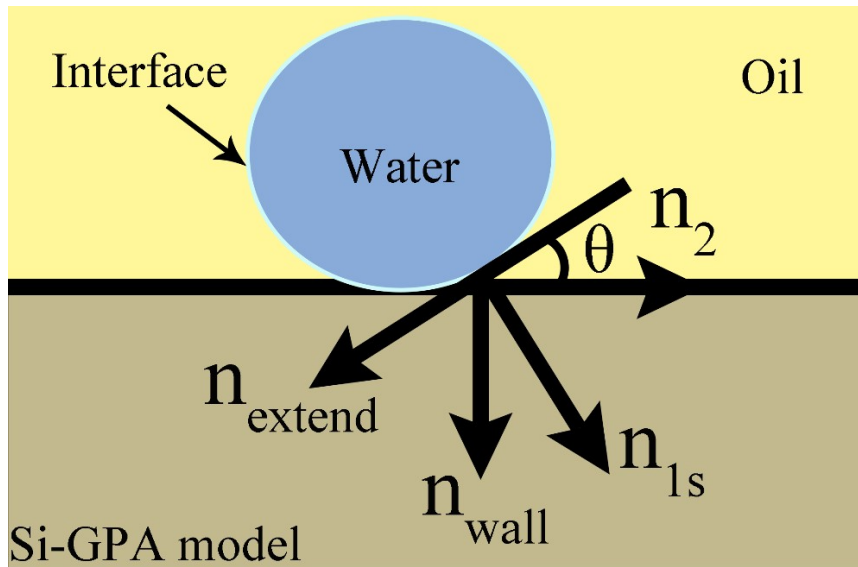

**Fig. S7** Schematic diagram of a method for describing wettability.



## References

1. H. Li, J. Zhang, S. Gan, X. Liu, L. Zhu, F. Xia, X. Luo and Q. Xue, *Advanced Functional Materials*, 2023, DOI: 10.1002/adfm.202212582.
2. L. Wang, J. Niu, S. Gao, Z. Liu, S. Wu, M. Huang, H. Li, M. Zhu and R. Yuan, *Journal of Membrane Science*, 2023, **670**.
3. X. Yan, Y. Wang, Z. Huang, Z. Gao, X. Mao, M. J. Kipper, L. Huang and J. Tang, *ACS Applied Nano Materials*, 2023, **6**, 4511-4521.
4. J. Li, S. Huang, L. Zhang, H. Zhao, W. Zhao, C. Yuan, X. J. S. Zhang and P. Technology, 2023, **313**, 123480.
5. Y. Liu, H. He, T. J. Zhang, T. C. Zhang, Y. Wang and S. Yuan, *J Hazard Mater*, 2023, **451**, 131142.
6. X. Li, X. He, Y. Ling, Z. Bai, C. Liu, X. Liu and K. Jia, *Journal of Membrane Science*, 2023, **675**.
7. Y.-J. Yeh, J. P. Chu, J.-D. You, T.-H. Chang, J. R. Liou, W.-H. Chiang, P. Yiu, C.-H. Hsueh, Y.-L. Shen and K.-L. Tung, *npj Clean Water*, 2023, **6**.
8. J. Chai, G. Wang, A. Zhang, X. Li, Z. Xu, J. Zhao and G. Zhao, *Chemical Engineering Journal*, 2023, **461**.
9. H. Chen, Z. Zuo, Q. Tian, S. Xue, F. Qiu, X. Peng and T. Zhang, *Journal of Cleaner Production*, 2023, **396**.
10. Y. Jiang, C. Xian, X. Xu, W. Zheng, T. Zhu, W. Cai, J. Huang and Y. J. J. o. M. S. Lai, 2023, **667**, 121166.
11. M. Xia, J. Gao, M. Cai, J. Li, X. Cao, H. Liu, Y. J. S. Chen and P. Technology, 2023, **311**, 123280.
12. Y. Li, T. Fan, W. Cui, X. Wang, S. Ramakrishna, Y. J. S. Long and P. Technology, 2023, **306**, 122586.
13. Y. Lu, H. Ma, F. Chen, Y. Zhao, L. Wen, C. Gao and L. J. J. o. M. S. Xue, 2023, 121419.
14. Y. Wang, C. Yuan, K. Zhou, Q. Gu, W. Jing, Z. Zhong and W. J. J. o. M. S. Xing, 2023, 121389.
15. C. Li, Y. Xiong, L. Zhao, H. Wan, J. Li, S. Fang, M. Wang, M. Duan, J. Ren and Y. J. L. Xiao, 2023.
